# Supplementary material
Source: publisher figshare collection journal article supplement (https://acs.figshare.com/ndownloader/files/15593057)
Supplement: Supplementary file 1 [file 15593057]

*Electronic Supplementary Information*

**Aprotic vs protic ionic liquids for lignocellulosic biomass pre-treatment: Anion effects, enzymatic hydrolysis, solid state NMR, distillation and recycle**

Md. Mokarrom Hossain,<sup>a</sup> Aditya Rawal<sup>b</sup> and Leigh Aldous<sup>a,c,\*</sup>

<sup>a</sup> *School of Chemistry, UNSW Sydney, Sydney, NSW 2052, Australia*

<sup>b</sup> *NMR Facility, Mark Wainwright Analytical Centre, UNSW Australia, Sydney, NSW 2052, Australia*

<sup>c</sup> *Department of Chemistry, Britannia House, 7 Trinity Street, King's College London, London, SE1 1DB, UK*

\* [leigh.aldous@kcl.ac.uk](mailto:leigh.aldous@kcl.ac.uk)

**Contains 15 pages (from S1 to S15), 4 Tables and 10 Figures**

|            |         |
|------------|---------|
| Table S1   | Page S2 |
| Table S2   | S3      |
| Table S3   | S4      |
| Table S4   | S5      |
| Figure S1  | S6      |
| Figure S2  | S7      |
| Figure S3  | S8      |
| Figure S4  | S9      |
| Figure S5  | S10     |
| Figure S6  | S11     |
| Figure S7  | S12     |
| Figure S8  | S13     |
| Figure S9  | S14     |
| Figure S10 | S15     |

## TABLES

**Table S1:** List of physical properties for five different ILs used in this study.

| <b>Ionic liquid</b> | <b>Melting point (°C)</b> | <b>pH at 100 g l<sup>-1</sup></b> | <b>Density (g cm<sup>-3</sup>)</b> | <b>Viscosity at 25 °C (mPa s)</b> | <b>T<sub>d (max)</sub> (°C)</b> |
|---------------------|---------------------------|-----------------------------------|------------------------------------|-----------------------------------|---------------------------------|
| [Emim][OAc]         | < 25                      | 6.5                               | 1.027 <sup>a,b</sup>               | 162 <sup>4</sup>                  | 245                             |
| [Emim]Cl            | 82 ± 5                    | 5.0                               | 1.112 <sup>a,c</sup>               | -                                 | 307                             |
| [Eim][OAc]          | < 25                      | 7.0                               | 1.026 <sup>b</sup>                 | 4.2                               | 193                             |
| [Eim][HCOO]         | < 25                      | 5.1                               | 1.092 <sup>b</sup>                 | 6.9                               | 190                             |
| [Eim]Cl             | 69 ± 5                    | 5.5                               | 1.128 <sup>c</sup>                 | -                                 | 276                             |

<sup>a</sup> data from Sigma-Aldrich, <sup>b</sup> at 25 °C, <sup>c</sup> at 80 °C, T<sub>d (max)</sub> is the temperatures at maximum rate of thermal decomposition

**Table S2:** Maximum solubility of wood flour and percentage of recovered solid from different ILs.

| <b>Ionic liquid</b> | <b>Maximum dissolution (wt%)</b>        | <b>Recovered solid (wt%)</b> |
|---------------------|-----------------------------------------|------------------------------|
| [Emim][OAc]         | 5.5 ( $\pm$ 0.5)                        | 80                           |
| [Emim]Cl            | 2.5 ( $\pm$ 0.5)                        | 48                           |
| [Eim]Cl             | 3.5 ( $\pm$ 0.5)                        | 58                           |
| [Eim][OAc]          | No dissolution<br>(only extract lignin) | 95                           |
| [Eim][HCOO]         | No dissolution<br>(only extract lignin) | 92                           |

Where, [Emim] = 1-ethyl-3-methylimidazolium, [Eim] = 1-ethylimidazolium,  
[OAc] = acetate and [HCOO] = formate.

**Table S3:** Maximum conversion efficiency from different ILs-treated wood after 96 h enzymatic hydrolysis.

| <b>Ionic liquid</b> | <b>Maximum enzymatic conversion (%)</b> |
|---------------------|-----------------------------------------|
| Untreated wood      | 15.7 ( $\pm$ 0.6)                       |
| [Emim][OAc]         | 86.7 ( $\pm$ 9.8)                       |
| [Emim]Cl            | 56.2 ( $\pm$ 0.6)                       |
| [Eim]Cl             | 74.6 ( $\pm$ 2.3)                       |
| [Eim][OAc]          | 12.7 ( $\pm$ 1.5)                       |

Where, [Emim] = 1-ethyl-3-methylimidazolium, [Eim] = 1-ethylimidazolium and [OAc] = acetate.

**Table S4:**  $^{13}\text{C}$  sNMR chemical shift assigned for various moieties of pine wood. All values and assignments are adapted from reference [1].

| <b>Moiety / Functional group</b>  | <b>Chemical shift region (ppm)</b> |
|-----------------------------------|------------------------------------|
| -COO/ $\text{CH}_3\text{COO}$     | 180-165                            |
| Aromatic C-O (C3, 4 of lignin)    | 160-141                            |
| Aromatic C-C (C1 of lignin)       | 141-125.8                          |
| Aromatic C-H (C2, 5, 6 of lignin) | 125.8-108.5                        |
| C1 of cellulose                   | 108.5-93.5                         |
| C4 of cellulose (crystalline)     | 93.5-86.6                          |
| C4 of cellulose (amorphous)       | 86.6-79.5                          |
| C2, 3, 5 of cellulose             | 79.5-68.0                          |
| C6 of cellulose                   | 68.0-58.9                          |
| $\text{OCH}_3$ of lignin          | 58.9-50.8                          |
| $\text{CH}_3$ of hemicellulose    | 24.1-18.6                          |

## FIGURES

**Figure S1:** Structure of five imidazolium-based protic ([Eim][OAc], [Eim][HCOO], [Eim]Cl) and aprotic ([Emim][OAc], [Emim]Cl) ionic liquids used for wood processing in this study.

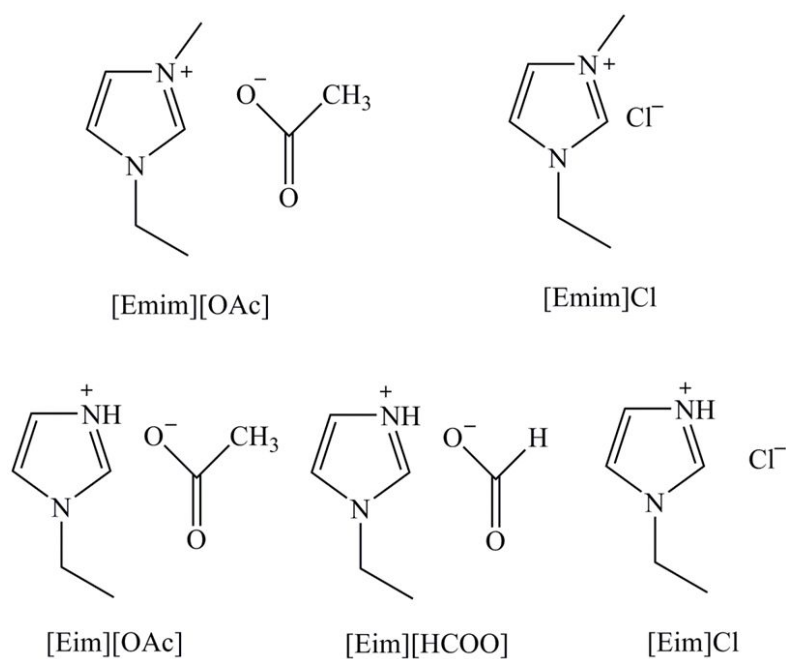

**Figure S2:**  $^1\text{H}$  NMR spectra for various  $[\text{Eim}]\text{Cl}$  in presence of excess 1-ethylimidazole (Eim) and HCl acid where the ratio of Eim and HCl was maintained as 1:0 (a), 1:0.5 (b), 1:1 (c), 1:1.5 (d) and 1:2 (e)

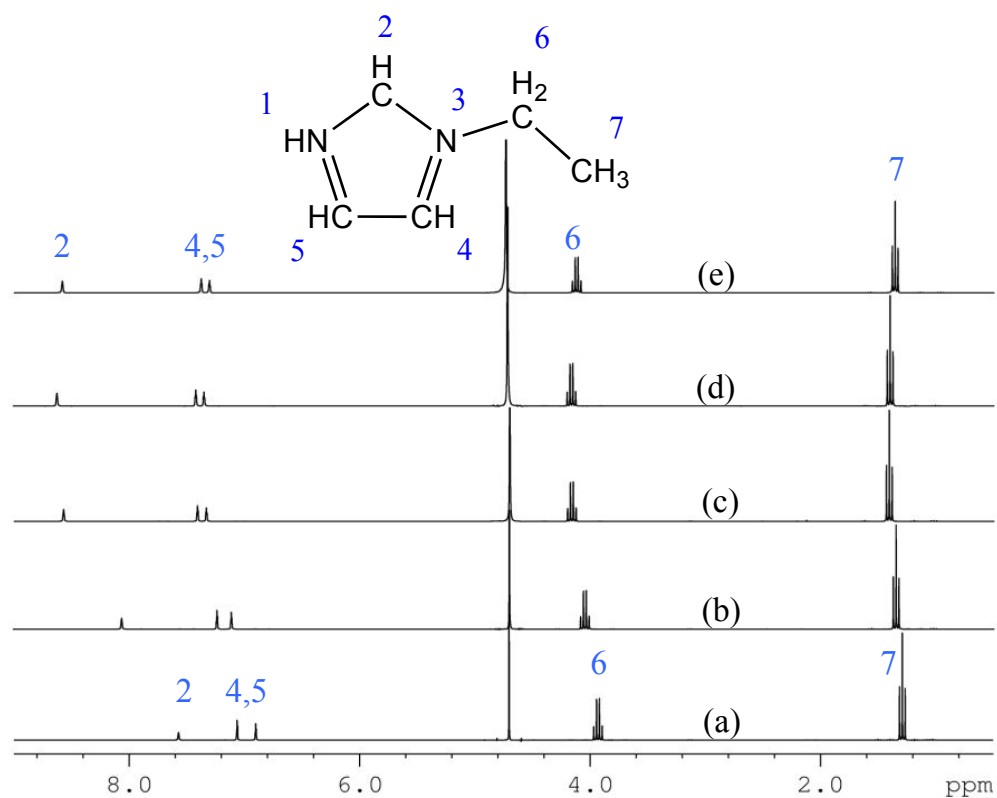

**Figure S3:** DSC curves for imidazolium-based protic ILs, [Eim][OAc], [Eim][HCOO], [Eim]Cl; their precursor 1-ethylimidazole and aprotic [Emim][OAc], [Emim]Cl ionic liquids.

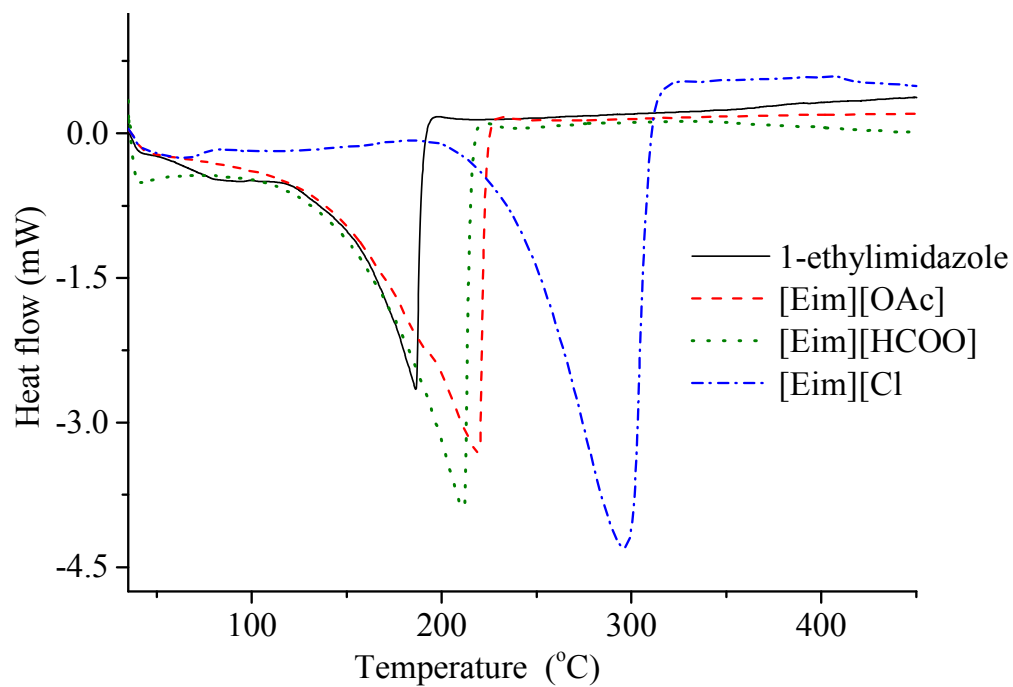



**Figure S4:** TGA curves for imidazolium-based protic ILs, [Emim][OAc], [Emim][HCOO], [Emim]Cl and their precursor, 1-ethylimidazole.

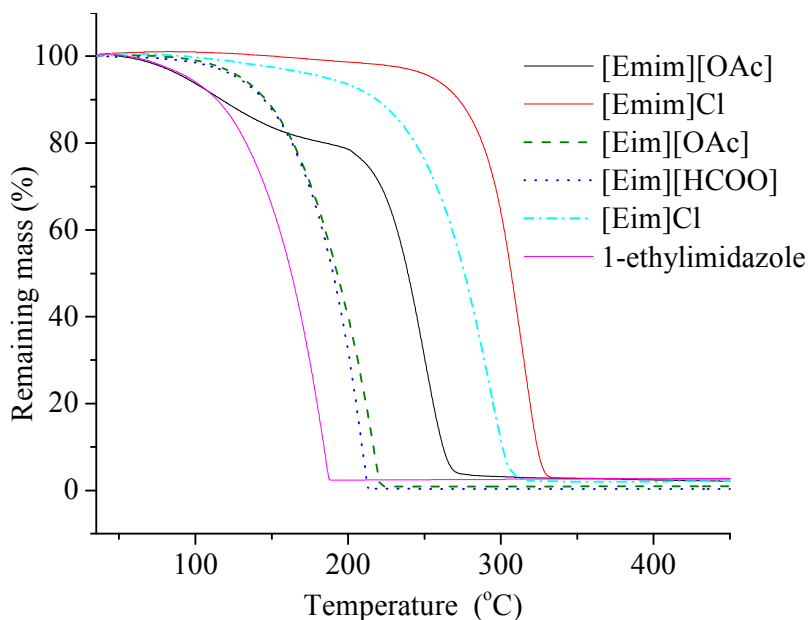

Please note [Emim][OAc], [Emim][HCOO] and [Emim]Cl were measured as synthesised, with water content <1wt%; the deliquescent, commercial [Emim]Cl was stored in a glovebox, and thus also had a water content of <1wt%; the commercial [Emim][OAc] was taken from the bottle directly (also <1wt% water content), but the significant mass loss before 200 °C is associated with water loss, whereby the water must have been uptaken by the sample from the atmosphere prior to measurement.

**Figure S5:** (a) UV-Vis spectra (b) plot of absorbance vs wood load for different amount of wood loading in [Eim][OAc] where 1 g of IL and different amount of wood flour were taken in round bottom flask at 115 °C for 18 h stirring at 700 rpm with reflux set-up.

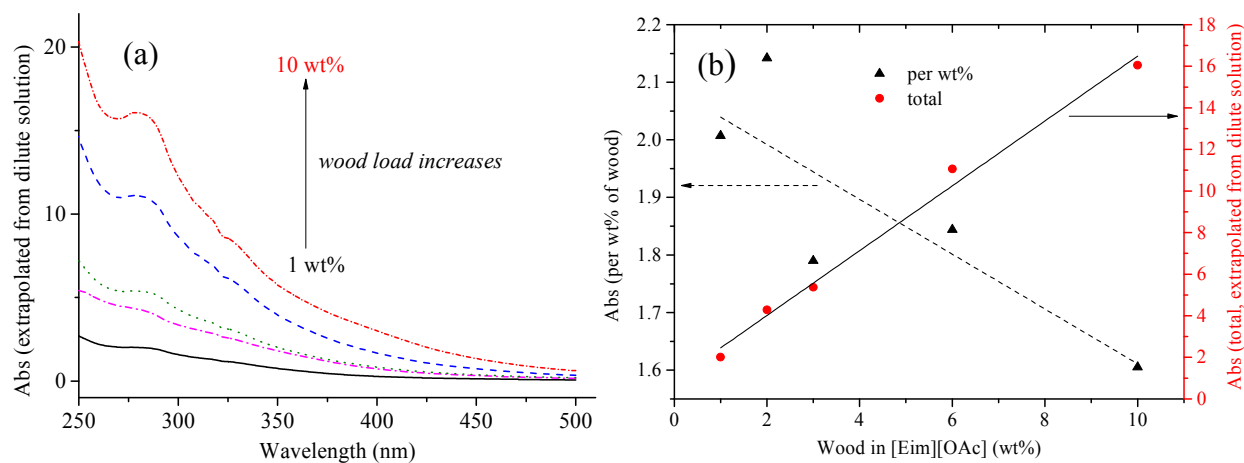

**Figure S6:** UV-Vis spectra for 1 wt% wood loading in [Eim][HCOO].

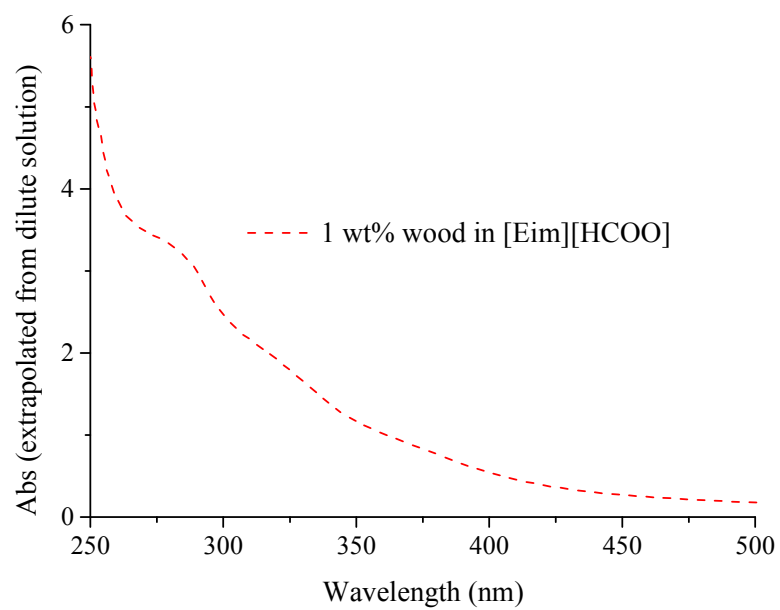

**Figure S7:** Calibration of commercial glucose sensor (Accucheck Active, used in this study) over its detection range (0.6 to 33.1 mM).

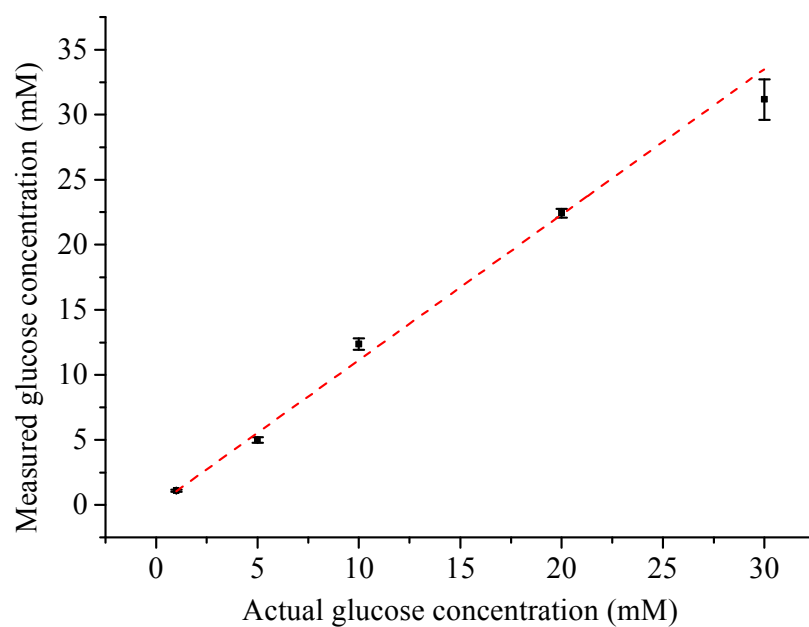

**Figure S8:** Thermogravimetric analysis of untreated wood and regenerated solid from different ionic liquids; [Emim][OAc], [Emim]Cl, [Eim][OAc], and [Eim]Cl.

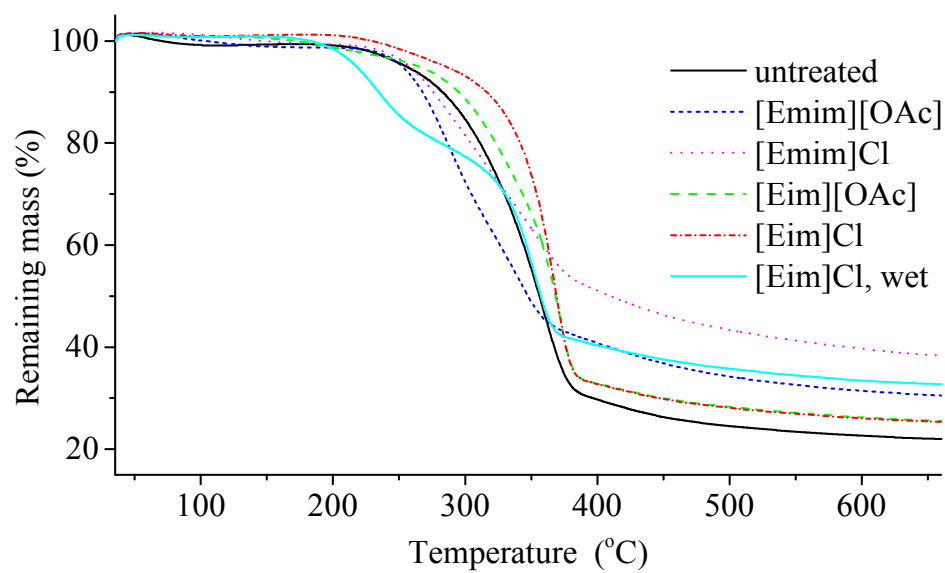

**Figure S9:** Photograph of contaminated [Eim]Cl distillation in Kugelrohr apparatus after 1<sup>st</sup> (a) and 2<sup>nd</sup> (b) distillation at 200 °C.

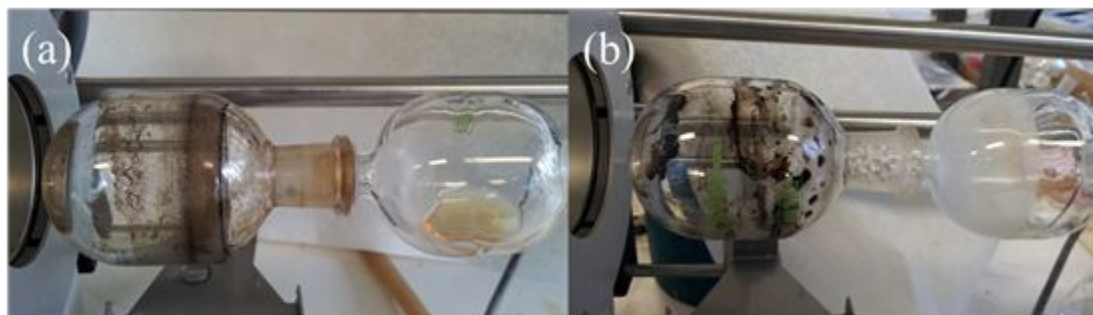

**Figure S10:** Enzymatic conversion of untreated wood, wood heated at 200 °C, regenerated solid from [Eim]Cl using acetone-water mixture, and regenerated solid from [Eim]Cl obtained after distillation in Kugelrohr apparatus.

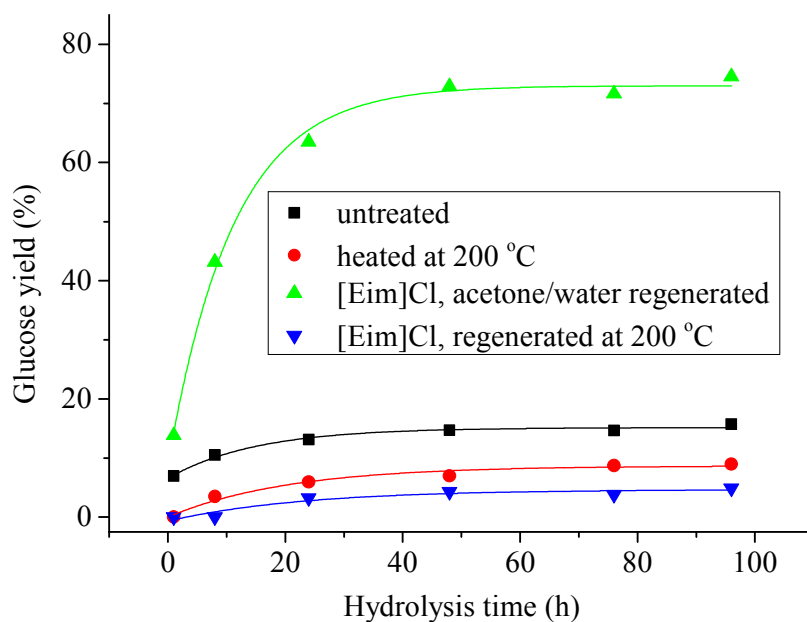

## REFERENCES

- [1] Holtman, K. M.; Chen, N.; Chappell, M. A.; Kadla, J. F.; Xu, L.; Mao, J. J. *Agric. Food Chem.* **2010**, *58*, 9882.
